# Supplementary material for: Impact on Bile Acid Concentrations by Alveolar Echinococcosis and Treatment with Albendazole in Mice
Source: MDPI journal article supplement (doi:10.3390/metabo11070442), 2021-07-06
Supplement: s1 [file s1]

## Supplementary file

### Impact on Bile Acid Concentrations by Alveolar Echinococcosis and Treatment with Albendazole in Mice

Cristina Gómez <sup>1</sup>, Fadi Jebbawi <sup>1</sup>, Michael Weingartner <sup>1</sup>, Junhua Wang <sup>2,3</sup>, Simon Stücheli <sup>1</sup>, Bruno Stieger <sup>4</sup>, Bruno Gottstein <sup>2,3</sup>, Guido Beldi <sup>5</sup>, Britta Lundström-Stadelmann <sup>2</sup> and Alex Odermatt <sup>1,\*</sup>

<sup>1</sup> Division of Molecular and Systems Toxicology, Department of Pharmaceutical Sciences, University of Basel, Klingelbergstrasse 50, 4056 Basel, Switzerland; cristina.gomezcastella@unibas.ch (C.G.); fadi.jebbawi@unibas.ch (F.J.); michael.weingartner@unibas.ch (M.W.); simon.stuecheli@unibas.ch (S.S.)

<sup>2</sup> Department of Infectious Diseases and Pathobiology, Vetsuisse Faculty, Institute of Parasitology, University of Berne, Länggassstrasse 122, 3012, Berne, Switzerland; junhua.wang@ifik.unibe.ch (J.W.); bruno.gottstein@ifik.unibe.ch (B.G.); britta.lundstroem@vetsuisse.unibe.ch (B.L.-S.)

<sup>3</sup> Faculty of Medicine, Institute for Infectious Diseases, University of Berne, Friedbühlstrasse 51, 3010, Berne, Switzerland

<sup>4</sup> Department of Clinical Pharmacology and Toxicology, University Hospital Zurich, University of Zurich, 8091 Zurich, Switzerland; bstieger@ethz.ch

<sup>5</sup> Department of Visceral Surgery and Medicine, University Hospital of Berne, Freiburgstrasse, 3010 Berne, Switzerland; Guido.Beldi@insel.ch

\* Correspondence: alex.odermatt@unibas.ch

**Table S1:** Optimized multiple reaction monitoring (MRM) transitions used as quantifiers and qualifiers, electrospray ionization (ESI) mode (positive (+) or negative (-)), and collision energies (CE).

| Compound                         | Abbreviation   | ESI | RT (min) | Transition    | CE (V) | Transition    | CE (V) |
|----------------------------------|----------------|-----|----------|---------------|--------|---------------|--------|
| Tauro- $\omega$ -muricholic acid | T $\omega$ MCA | +   | 2.82     | 480.3 > 126   | 24     | 480.3 > 462.1 | 8      |
| Tauro- $\alpha$ -muricholic acid | T $\alpha$ MCA | +   | 3.07     | 480.3 > 126   | 24     | 480.3 > 462.1 | 8      |
| Tauro- $\beta$ -muricholic acid  | T $\beta$ MCA  | +   | 3.30     | 480.3 > 126   | 24     | 480.3 > 462.2 | 8      |
| Tauro-ursodeoxycholic acid       | TUDCA          | +   | 5.20     | 464.2 > 126   | 28     | 464.2 > 464.2 | 0      |
| Tauro-ursodeoxycholic acid       | TUDCA          | -   | 5.20     | 498.2 > 124.2 | 47     | -             | -      |
| Tauro-cholic acid                | TCA            | +   | 5.45     | 480.3 > 461.9 | 8      | 480.3 > 126   | 24     |
| Tauro-cholic acid                | TCA            | -   | 5.45     | 514.2 > 124.2 | 46     | -             | -      |
| Tauro-7-oxolithocholic acid      | T7oxoLCA       | +   | 5.84     | 480.3 > 126   | 24     | 480.3 > 461.9 | 8      |
| $\omega$ -muricholic acid        | $\omega$ MCA   | +   | 6.29     | 373.3 > 159.1 | 20     | 373.3 > 355.2 | 15     |
| Glyco-ursodeoxycholic acid       | GUDCA          | -   | 6.43     | 448.2 > 74    | 37     | 448.2 > 386.1 | 35     |
| Glyco-ursodeoxycholic acid       | GUDCA          | -   | 6.43     | 448.2 > 404.1 | 40     | -             | -      |
| $\alpha$ -muricholic acid        | $\alpha$ MCA   | +   | 6.50     | 373.3 > 355.2 | 15     | 373.3 > 105.1 |        |
| Glyco-cholic acid                | GCA            | -   | 6.63     | 464.4 > 74    | 37     | 464.2 > 402.1 | 25     |
| 7-oxo-deoxycholic acid           | 7oxoDCA        | +   | 6.81     | 371.3 > 353.2 | 8      | 371.3 > 335.2 | 12     |
| $\beta$ -muricholic acid         | $\beta$ MCA    | +   | 6.85     | 391.3 > 355.2 | 16     | 373.3 > 355.2 | 8      |
| $\beta$ -muricholic acid         | $\beta$ MCA    | +   | 6.85     | 373.3 > 105.1 | 58     | -             | -      |
| Glyco-7-oxo-lithocholic acid     | G7oxoLCA       | -   | 7.63     | 446.2 > 74    | 37     | 446.2 > 330.1 | 49     |
| Tauro-chenodeoxycholic acid      | TCDC           | +   | 7.91     | 464.2 > 126   | 28     | 464.2 > 464.2 | 0      |
| Tauro-chenodeoxycholic acid      | TCDC           | -   | 7.91     | 498.2 > 124.2 | 45     | -             | -      |
| $\gamma$ -muricholic acid        | $\gamma$ MCA   | +   | 8.14     | 373.3 > 355   | 16     | 391.3 > 355.2 | 10     |
| Tauro-deoxycholic acid           | TDCA           | -   | 8.79     | 498.2 > 124.2 | 45     | -             | -      |

|                                   |                    |   |       |               |    |               |    |
|-----------------------------------|--------------------|---|-------|---------------|----|---------------|----|
| Tauro-deoxycholic acid            | TDCA               | + | 8.79  | 464.2 > 126   | 28 | 464.2 > 464.2 | 0  |
| Allo-cholic acid                  | AlloCA             | + | 9.44  | 373.3 > 355.2 | 12 | 373.3 > 159.1 | 20 |
| Cholic Acid                       | CA                 | + | 9.81  | 373.3 > 355.2 | 8  | 373.3 > 159.1 | 20 |
| Ursodeoxycholic acid              | UDCA               | + | 9.92  | 357.2 > 95    | 35 | 357.2 > 80.9  | 50 |
| Allo-3 $\beta$ -deoxycholic acid  | Allo3 $\beta$ DCA  | - | 10.10 | 391.3 > 345.1 | 40 | 391.3 > 342.8 | 40 |
| Hyodeoxycholic acid               | HDCA               | + | 10.34 | 357.2 > 95.1  | 40 | 357.3 > 104.8 | 50 |
| Glyco-chenodeoxycholic acid       | GCDCA              | - | 10.58 | 448.2 > 74    | 30 | 448.2 > 404.1 | 32 |
| Glyco-deoxycholic acid            | GDCA               | - | 11.43 | 448.2 > 74    | 30 | 448.2 > 404.1 | 32 |
| Glyco-deoxycholic acid            | GDCA               | - | 11.43 | 448.2 > 386.1 | 35 | -             | -  |
| 6,7-dioxo-lithocholic acid        | 6,7dioxoLCA        | + | 11.71 | 405.3 > 351.1 | 12 | 405.3 > 333.1 | 16 |
| 7-oxolithocholic acid             | 7oxoLCA            | + | 11.80 | 373.3 > 355.1 | 8  | 373.3 > 105.1 | 58 |
| Allo-12 $\beta$ -deoxycholic acid | Allo12 $\beta$ DCA | - | 11.94 | 391.3 > 345.1 | 36 | 391.3 > 327.3 | 40 |
| 12-oxo-lithocholic acid           | 12oxoLCA           | + | 12.25 | 391.3 > 145.1 | 32 | 391.3 > 309.3 | 20 |
| Tauro-lithocholic acid            | TLCA               | - | 13.11 | 482.2 > 80    | 56 | 482.2 > 107.2 | 50 |
| Tauro-lithocholic acid            | TLCA               | - | 13.11 | 482.2 > 124.2 | 45 | -             | -  |
| Chenodeoxycholic acid             | CDCA               | + | 13.76 | 357.2 > 104.9 | 50 | 357.2 > 81.1  | 48 |
| Allo-deoxycholic acid             | AlloDCA            | - | 13.91 | 391.3 > 345   | 36 | 391.3 > 327.1 | 40 |
| Allo-deoxycholic acid             | AlloDCA            | + | 13.91 | 357.2 > 104.9 | 50 | 357.2 > 81.1  | 48 |
| Deoxycholic acid                  | DCA                | - | 14.14 | 391.3 > 345   | 36 | 391.3 > 327.1 | 40 |
| Deoxycholic acid                  | DCA                | + | 14.14 | 357.2 > 104.9 | 50 | 357.2 > 81.1  | 48 |
| Glyco-lithocholic acid            | GLCA               | - | 14.59 | 432.2 > 74    | 41 | 432.2 > 388.1 | 37 |
| Allo-3 $\beta$ -lithocholic acid  | Allo3 $\beta$ LCA  | + | 15.56 | 359.3 > 135.1 | 25 | 359.3 > 95.1  | 32 |
| Allo-lithocholic acid             | AlloLCA            | + | 17.08 | 359.3 > 135.1 | 25 | 359.3 > 95.1  | 32 |
| Lithocholic acid                  | LCA                | + | 17.19 | 359.3 > 135.1 | 24 | 359.3 > 95.1  | 32 |
| 3-oxo-lithocholic acid            | 3oxoLCA            | + | 17.43 | 357.3 > 80.9  | 48 | 357.3 > 95.1  | 40 |
| <b>Internal Standards</b>         |                    |   |       |               |    |               |    |
| d4-Glyco-ursodeoxycholic acid     | d4-GUDCA           | - | 6.40  | 452.2 > 74    | 37 | -             | -  |
| d4-Glyco-cholic acid              | d4-GCA             | - | 6.61  | 468.2 > 74    | 49 | -             | -  |
| d4-Cholic acid                    | d4-CA              | + | 9.79  | 377.3 > 359.2 | 8  | -             | -  |
| d4-Ursodeoxycholic acid           | d4-UDCA            | + | 10.02 | 361.2 > 95.1  | 40 | -             | -  |
| d4-Glyco-chenodeoxycholic acid    | d4-GCDCA           | - | 10.55 | 452.2 > 74    | 37 | -             | -  |
| d4-Chenodeoxycholic acid          | d4-CDCA            | + | 13.70 | 361.3 > 95.1  | 40 | -             | -  |
| d4-Deoxycholic acid               | d4-DCA             | + | 14.16 | 361.3 > 95.1  | 40 | -             | -  |
| d4-Lithocholic acid               | d4-LCA             | + | 17.05 | 363.3 > 139.1 | 24 | -             | -  |

**Table S2:** Oligonucleotide primers for mRNA quantification by qPCR.

| Gene                             | Forward                 | Reverse                 |
|----------------------------------|-------------------------|-------------------------|
| <i>Bsep</i>                      | TGGTAGAGAAGAGGCGACAAT   | TGAGGTAGCCATGTCCAGAA    |
| <i>Ntcp</i>                      | GCCACACTATGTACCCTACGTC  | TTTAGTCGGAAGAGAGCAGAGA  |
| <i>Mrp4</i>                      | CATCAAGTCCAGGGAAAAGGTTG | GAGGGCCGAGATGAGGGAG     |
| <i>Mrp2</i>                      | GCTTAGTTCAAGTCTATGGAGT  | TCCGGCCGATACCGCACTTGATA |
| <i>Cyp7a1</i>                    | CTTGAGGATGGTTCCTATAAC   | TTAAAAGTCAAAGGGTCTGG    |
| <i>Cyp27a1</i>                   | AAAGCTGTGATTAAGGAGAC    | CAAAGTGTGTATTCTTGGGG    |
| <i>Oatp1b2</i>                   | CAACCTGACTGGTTTCTATG    | AAGTGAAGGATCCAATGAAG    |
| <i>Slc51a</i><br>( <i>Osta</i> ) | CTTGACCCCAGGTACACAGC    | ATGGGGCAAAGGGTGTCTT     |
| <i>Slc51b</i><br>( <i>Ost</i> )  | AGATGCGGCTCCTTGAATTA    | TGGCAGAAAGACAAGTGATG    |

|                |                         |                         |
|----------------|-------------------------|-------------------------|
| <i>Oatp1a1</i> | TAGCTTGCCTCCAGTATGCCTT  | ACAGGCCAAATGCTATGTATGC  |
| <i>Akr1d1</i>  | GAAAAGATAGCAGAAGGGAAGGT | GGGACATGCTCTGTATTCCATAA |
| <i>Actb</i>    | ACCCTGTGCTGCTCACC GA    | CTGGATGGCTACGTACATGGCT  |

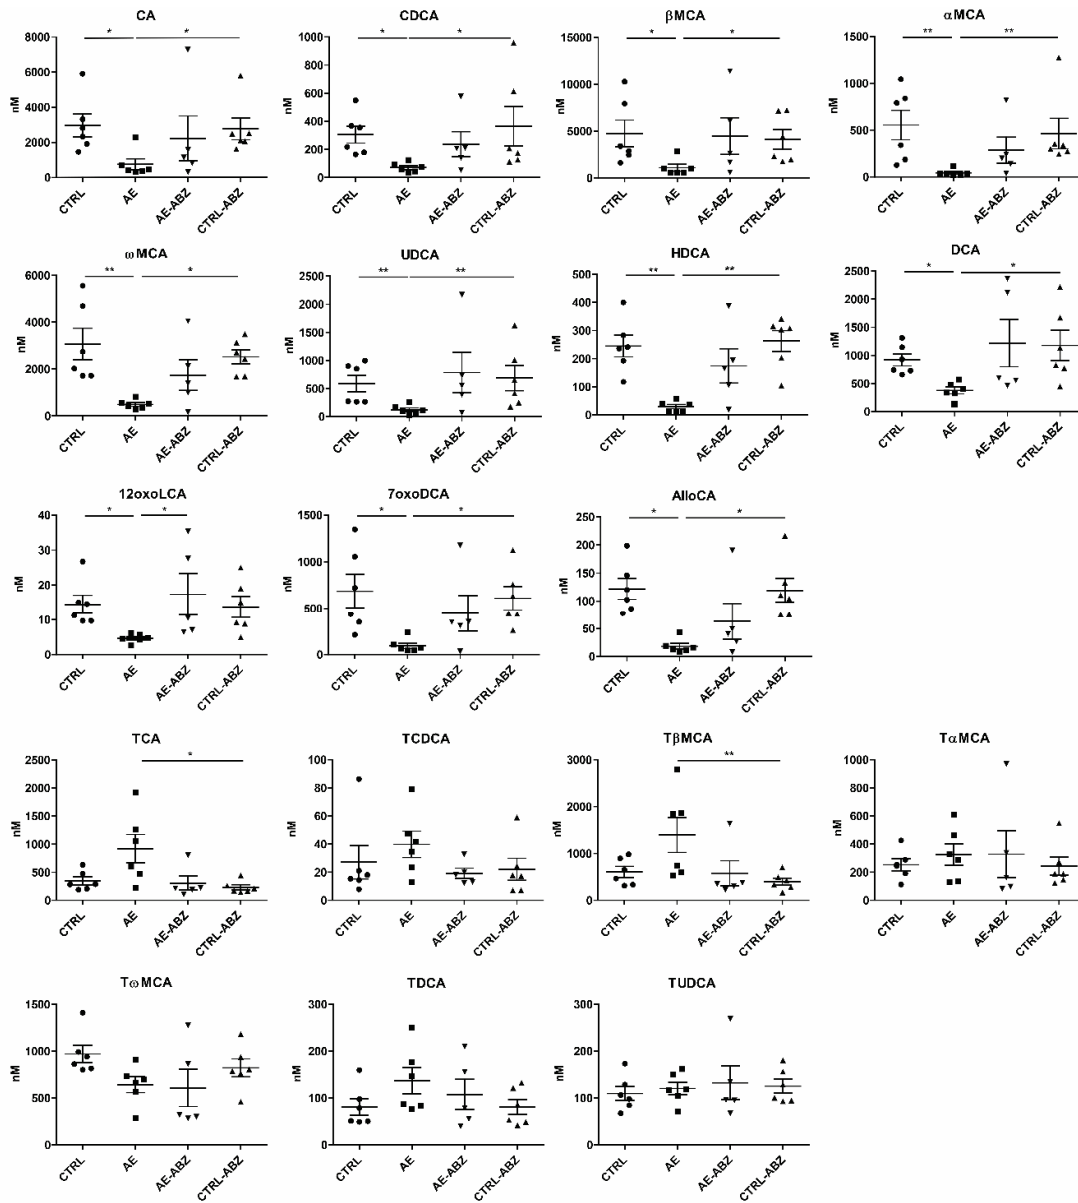

**Figure S1.** Concentrations of individual bile acids quantified in serum of mice from the four treatment groups. Non-infected control (CTRL, n=6), *E. multilocularis* infected (AE, n=6), *E. multilocularis* infected and ABZ treated (AE-ABZ, n=5, one outlier with aberrant concentrations was removed), and non-infected and ABZ treated control mice (CTRL-ABZ, n=6). Values are expressed as mean  $\pm$  SD (nM). \* p < 0.05 and \*\* p < 0.01.

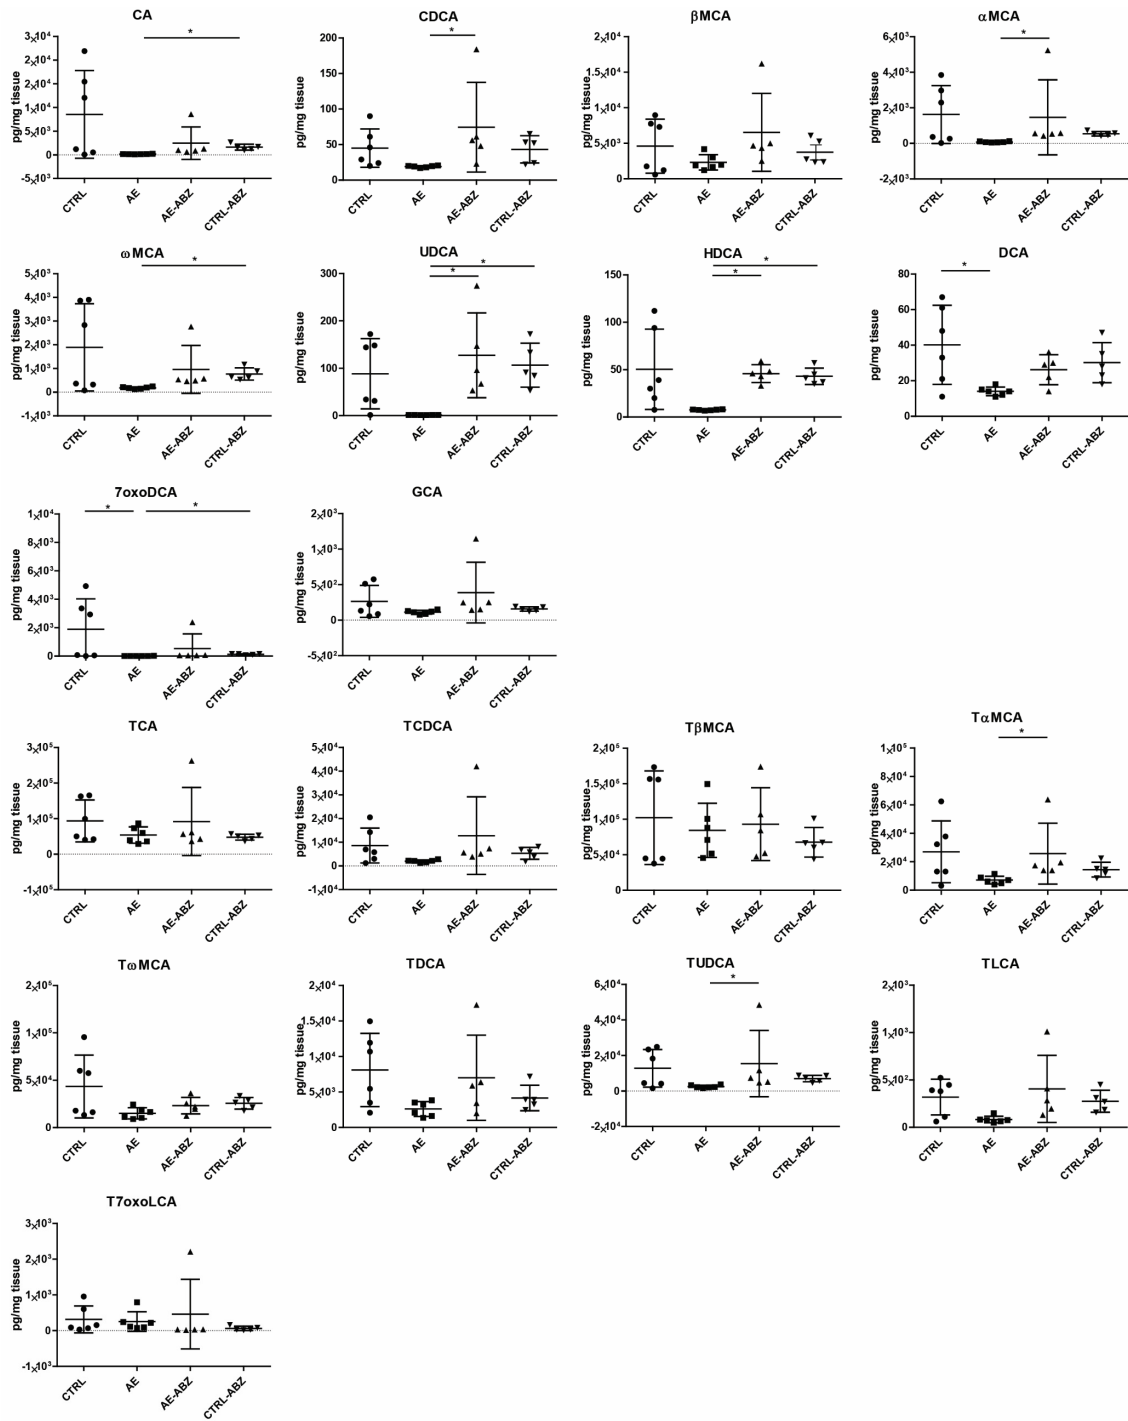

**Figure S2.** Concentrations of individual bile acids quantified in liver tissue of mice from the four treatment groups. Non-infected control (CTRL, n=6), *E. multilocularis* infected (AE, n=6), *E. multilocularis* infected and ABZ treated (AE-ABZ, n=5, one outlier with aberrant concentrations was removed), and non-infected and ABZ treated control mice (CTRL-ABZ, n=5, one outlier with aberrant concentrations was removed). Values are expressed as mean  $\pm$  SD (pg/mg tissue). \* p < 0.05 and \*\* p < 0.01.

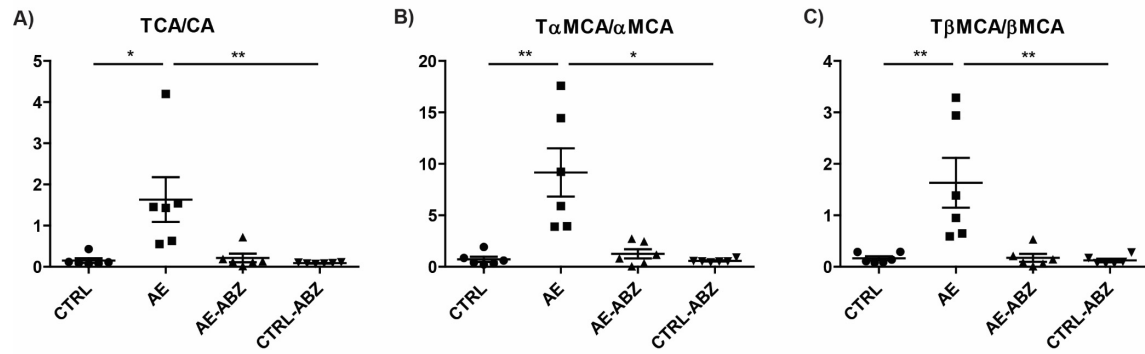

**Figure S3:** Increased ratios of taurine-conjugated to unconjugated bile acids in serum of AE mice. The ratios of the serum concentrations of the taurine-conjugated cholic acid (A),  $\alpha$ -muricholic acid (B) and  $\beta$ -muricholic acid (C) to the respective unconjugated bile acid were determined in the four different treatment groups. Non-infected control (CTRL, n=6), *E. multilocularis* infected (AE, n=6), *E. multilocularis* infected and ABZ treated (AE-ABZ, n=5, one outlier with aberrant concentrations was removed), and non-infected and ABZ treated control mice (CTRL-ABZ, n=6). Values are expressed as mean  $\pm$  SD. \* p < 0.05 and \*\* p < 0.01.

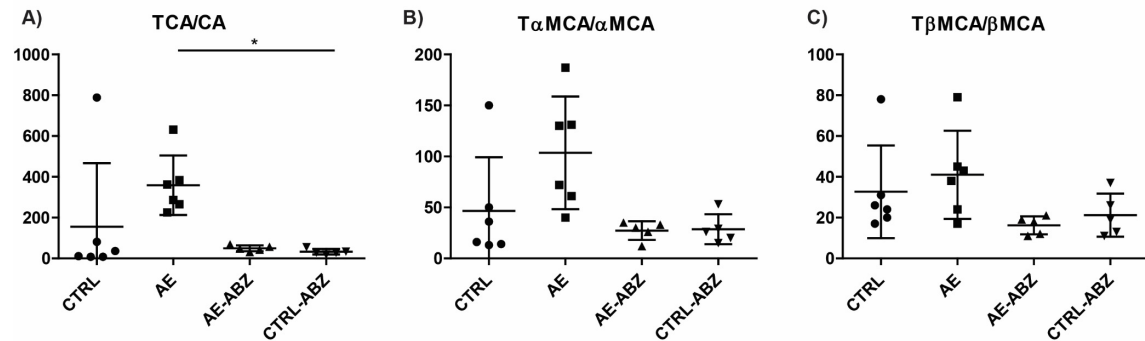

**Figure S4:** Ratios of taurine-conjugated to unconjugated bile acids in liver tissues of AE mice. The ratios of the liver tissue concentrations of the taurine-conjugated cholic acid (A),  $\alpha$ -muricholic acid (B) and  $\beta$ -muricholic acid (C) to the respective unconjugated bile acid were determined in the four different treatment groups in liver tissue. Non-infected control (CTRL, n=6), *E. multilocularis* infected (AE, n=6), *E. multilocularis* infected and ABZ treated (AE-ABZ, n=5, one outlier with aberrant concentrations was removed), and non-infected and ABZ treated control mice (CTRL-ABZ, n=5, one outlier with aberrant concentrations was removed). Values are expressed as mean  $\pm$  SD. \* p < 0.05.

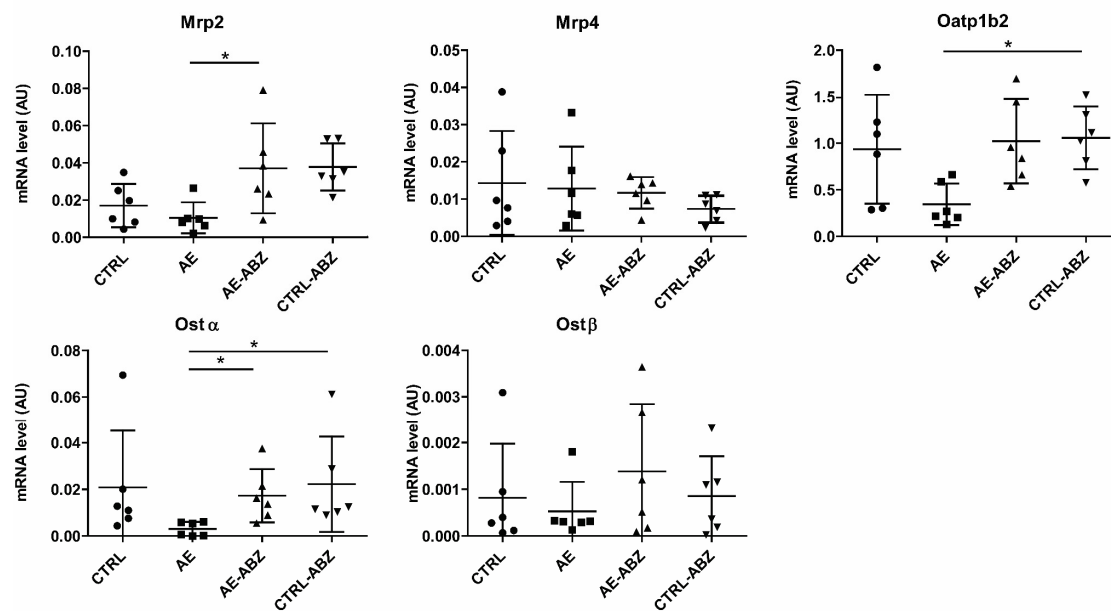

**Figure S5.** Effect of AE on mRNA expression levels of additional bile acid transporters. The mRNA levels of Mrp2, Mrp4, Ostα, Ostβ, and Oatp1b2 were determined in liver tissues of non-infected control (CTRL, n=6), *E. multilocularis* infected (AE, n=6), *E. multilocularis* infected and ABZ treated (AE-ABZ, n=6), and non-infected and ABZ treated control mice (CTRL-ABZ, n=6). Values are expressed as mean ± SD. \* p < 0.05.
